# Supplementary material
Source: MDPI journal article supplement (https://www.mdpi.com/2071-1050/10/6/2011)
Supplement: s1 [file s1]

*Supplementary material for paper***Evaluating the potential business benefits of ecodesign implementation: a logic model approach**

Vinicius P. Rodrigues<sup>a,b\*</sup>, Daniela C. A. Pigosso<sup>a</sup>, Jakob W. Andersen<sup>a</sup>, Tim C. McAloone<sup>a</sup>

<sup>a</sup> Technical University of Denmark, Department of Mechanical Engineering, Building 426, Produktionstorvet, 2800 Kgs. Lyngby, Denmark

<sup>b</sup> Insper, Rua Quatá 300, Vila Olímpia, 04546-042, São Paulo, Brazil

\*Corresponding author

E-mail addresses: [vipiro@dtu.dk](mailto:vipiro@dtu.dk), [danpi@dtu.dk](mailto:danpi@dtu.dk), [jawan@dtu.dk](mailto:jawan@dtu.dk), [tmca@dtu.dk](mailto:tmca@dtu.dk)

**Full database of categorized logic models with the description of their structural elements and the main topic they are addressing**

| #  | Reference                     | Logic Model Structure                                                                                               | Theme                                                |
|----|-------------------------------|---------------------------------------------------------------------------------------------------------------------|------------------------------------------------------|
| 1  | (Adamson and Prion, 2016)     | Inputs, Outputs, Outcomes                                                                                           | Generic                                              |
| 2  | (Addor et al., 2005)          | Situation, inputs, outputs, outcomes and impacts                                                                    | Model for the Natural Resources Leadership Institute |
| 3  | (Afifi et al., 2011)          | Assumptions, inputs, activities, output, intermediate outcome, impact                                               | Youth mental health                                  |
| 4  | (Allen et al., 2017)          | Activities, outputs, outcomes                                                                                       | Decision support systems                             |
| 5  | (Aragón et al., 2010)         | Internal conditions for change, social conditions for change                                                        | Purposeful organizational capacity development       |
| 6  | (Armstrong and Barsion, 2006) | Inputs, activities, outputs, outcomes                                                                               | Faculty development programs                         |
| 7  | (Baxter et al., 2010)         | Wider influences, causes/intervention points, outcomes                                                              | Public health reviews                                |
| 8  | (Baxter et al., 2014)         | Intervention types, short term outcomes, moderating and mediating factors, demand management outcomes, impact       | Referral of patients for specialist care             |
| 9  | (Biggs et al., 2016)          | Enabling actions, actions, outputs, outcomes, impact                                                                | Illegal wildlife trade                               |
| 10 | (Breuer et al., 2014)         | Outcome, intervention, long-term outcome, impact                                                                    | Mental healthcare                                    |
| 11 | (Brown, 2012)                 | Inputs, Activities, Outputs, Outcomes, Impact                                                                       | Graduate internship programs                         |
| 12 | (Bucher, 2010)                | Inputs, activities, outputs, priority audience, short-term outcomes, intermediate-term outcomes, long-term outcomes | Tobacco control                                      |
| 13 | (Campbell et al., 2015)       | Inputs, Outputs (Activities), Outputs (Participants), Outcomes - immediate, intermediate and impact                 | Fellowship education program                         |
| 14 | (Carman, 2010)                | Inputs, activities, outputs, outcomes                                                                               | Nonprofit funding and performance measurement        |

|    |                               |                                                                                                                                                                                                                 |                                                             |
|----|-------------------------------|-----------------------------------------------------------------------------------------------------------------------------------------------------------------------------------------------------------------|-------------------------------------------------------------|
| 15 | (Cato, 2001)                  | Assumptions (Theoretical Premises), Activities (Program Activities), Immediate Outcomes (Evaluate Activities), Intermediate Outcomes (Objectives), Long Term Outcomes (goals)                                   | Prevention of drug and alcohol abuse                        |
| 16 | (Chaskin, 2009)               | Goals, Inputs, Outcomes short-term, Outcomes mid-term, Outcomes long-term                                                                                                                                       | Community-based youth development                           |
| 17 | (Clarke et al., 2014)         | Intervention components, mediator, proximal outcome, distal outcome                                                                                                                                             | Student evaluation activities                               |
| 18 | (Cooksy et al., 2001)         | Staff activities, participant activities, initial outcomes, intermediate outcomes, longer-term outcomes                                                                                                         | School curriculum delivery program                          |
| 19 | (Copper, 2011)                | Inputs (resources), work-steps (activities), deliverable product (output), goals (outcomes), results (impact)                                                                                                   | Role of informationists in healthcare                       |
| 20 | (Csiernik et al., 2015)       | Program Components, Activities, Target Population, Outputs, Short-term outcomes, long-term outcomes                                                                                                             | Employee assistance programs                                |
| 21 | (Cullen et al., 2016)         | Inputs, Outputs (Objectives), Outputs (implementation), Short-term Outcomes, Long-term outcomes                                                                                                                 | Driver licensing program                                    |
| 22 | (Das et al., 2014)            | Resources, activities, outputs, short-term outcomes, long-term outcomes                                                                                                                                         | Employee wellness programs                                  |
| 23 | (De-Regil et al., 2017)       | Inputs, activities, outputs, outcomes                                                                                                                                                                           | Vitamin and mineral interventions in public health programs |
| 24 | (Dorsey et al., 2014)         | Inputs, Outputs (Activities), Outputs (Participants), Outcomes/Impact - short, medium, long                                                                                                                     | Cross-disciplinary collaboration                            |
| 25 | (Dubeau et al., 2015)         | Problems, Needs, Resources and influential factors, Action Hypotheses, Strategies, Outputs, Results, Impacts                                                                                                    | Father support program (family intervention)                |
| 26 | (Dykeman et al., 2003)        | Faculty roles, Process, Outcomes, Accountability, Integrated Outcome Evaluation / Goals (Current Resources, Target Population), Components, Process, short-term outcomes, mid-term outcomes, long-term outcomes | Community health clinic management                          |
| 27 | (Dyson and Todd, 2017)        | Situation, main strands of action, outcomes                                                                                                                                                                     | Evaluation of extended schools' initiatives                 |
| 28 | (Fielden et al., 2007)        | Inputs, program activities, immediate outputs, outcomes, long-term impacts                                                                                                                                      | Development of community-based research partnerships        |
| 29 | (Francesconi and Ruben, 2017) | Practices and (income) impact                                                                                                                                                                                   | Cooperativism (Fairtrade certification)                     |
| 30 | (Freedman et al., 2014)       | Activities, Outputs, Short-term goals, intermediate goals, long-term goals                                                                                                                                      | Evaluation of a public health training center               |
| 31 | (Goeschel et al., 2017)       | Inputs, activities, outputs, objectives, results, goal                                                                                                                                                          | Quality and patient safety evaluation                       |
| 32 | (Goldman and Schmalz, 2006)   | Situation, Priorities, Inputs, Outputs (activities), outputs (participation), outcomes- impact (short-term, medium-term, long-term) / Inputs, activities, short-term and mid-term outcomes, long-term outcomes  | Generic                                                     |

|    |                              |                                                                                                                                                                                            |                                                               |
|----|------------------------------|--------------------------------------------------------------------------------------------------------------------------------------------------------------------------------------------|---------------------------------------------------------------|
| 33 | (Hailemariam et al., 2015)   | Baseline context, pre-conditions (short-term outcome), long-term outcomes, impact                                                                                                          | Development of mental healthcare plan in low-resource setting |
| 34 | (Hayes et al., 2011)         | Target population, underlying assumptions, resources/challenges, activities, outputs, outcomes / Target population, assumptions, inputs, activities, outputs, outcomes, outcome indicators | Primary care practice-based research network                  |
| 35 | (Helitzer et al., 2010)      | Risk & Protective Factors, Resources (Inputs), Activities (outputs), Immediate Impact (Mediating Factors), Short-term outcome, Outcomes                                                    | Evaluation of community-based programs                        |
| 36 | (Helitzer et al., 2009)      | Risk & Protective Factors, Resources (Inputs), Activities (outputs), Short-term outcomes, Long-Term Outcomes                                                                               | Agricultural injury prevention                                |
| 37 | (Hense et al., 2009)         | Input, Process, short-term outcomes, long-term outcomes                                                                                                                                    | Evaluation of business games for secondary school             |
| 38 | (Hernandez and Hodges, 2006) | Populations, Values/principles, strategies, outcomes                                                                                                                                       | Interagency planning in child mental health                   |
| 39 | (Herranz, 2017)              | Resources, activities, outputs, intermediate outcomes, end outcomes                                                                                                                        | Network performance measurement system                        |
| 40 | (Holliday, 2014)             | Inputs, Outputs (Activities), Outcomes (short-term) / Outputs (activities), themes (challenges and needs), outcomes (short-term)                                                           | Program fidelity evaluation in schools                        |
| 41 | (Hornik et al., 2016)        | Processes and long-term (sustainability-related) outcomes                                                                                                                                  | Justice in community-based sustainability interventions       |
| 42 | (Huhman et al., 2004)        | Inputs, activities, short- and mid-term outcomes, long-term outcomes                                                                                                                       | Evaluation of a healthcare campaign                           |
| 43 | (Hutchings, 2017)            | Intervention, outputs, outcomes, impact                                                                                                                                                    | Global nonprofit performance                                  |
| 44 | (Hyvärinen, 2017)            | Input, activities, output, impact                                                                                                                                                          | Funding of public research, development and innovation        |
| 45 | (Isaacs et al., 2009)        | Activities, Target Groups, Short-term outcomes, Intermediate outcomes, long-term outcomes                                                                                                  | Quality of life evaluation                                    |
| 46 | (Jaegers et al., 2014)       | Recruitment, Designed Activities, Activity outputs, short-term impacts, intermediate impacts, long term outcomes                                                                           | Participatory ergonomics intervention                         |
| 47 | (Jordan, 2017)               | Needs/opportunities, activities, end outcomes, system effects                                                                                                                              | Innovation policy and evaluation                              |
| 48 | (Julian, 1997)               | Conditions, activities, outcomes, impacts                                                                                                                                                  | Generic                                                       |
| 49 | (Julian et al., 1995)        | Conditions/problem statement, activities, outcomes, impacts                                                                                                                                | Generic                                                       |
| 50 | (Klugman, 2011)              | Strategies and outcomes                                                                                                                                                                    | Social justice advocacy                                       |
| 51 | (Lee and Kang, 2014)         | Resource, activity, output, outcome                                                                                                                                                        | Multicultural mentoring                                       |
| 52 | (Loiseau et al., 2016)       | Problem, community needs/assets, desired outputs, influential factors, assumptions, strategies                                                                                             | International volunteering                                    |
| 53 | (Mackenzie and Blamey, 2005) | Problems, work themes (activities and outcomes), 3-year outputs/outcomes, 10-15 year outcomes, goals                                                                                       | Complex community interventions                               |

|    |                               |                                                                                                                                                                                                                                      |                                                     |
|----|-------------------------------|--------------------------------------------------------------------------------------------------------------------------------------------------------------------------------------------------------------------------------------|-----------------------------------------------------|
| 54 | (MacPhee, 2009)               | Inputs, activities, outputs, outcomes                                                                                                                                                                                                | Practice-academic partnerships                      |
| 55 | (Mayne, 2016)                 | Assumptions, external influences, unanticipated results, activities, outputs, reach & reaction, capacity changes (knowledge, attitudes, aspirations, skills & opportunities), behavior changes, direct benefits, well-being benefits | Generic                                             |
| 56 | (McLaughlin and Jordan, 1999) | Resources (inputs), activities, outputs, short-term outcomes, intermediate outcomes, long-term outcomes & problem solution, external influences and related programs                                                                 | Generic                                             |
| 57 | (Medeiros et al., 2005)       | Inputs, outputs (activities/participants), outcomes (short, medium and long)                                                                                                                                                         | Nutrition education                                 |
| 58 | (Millar et al., 2001)         | Inputs, activities, outputs, initial outcomes, intermediate outcomes, long-term outcomes                                                                                                                                             | Generic                                             |
| 59 | (Monroe et al., 2012)         | Theories, inputs, activities, outputs (actual implementation vs. desired), outcomes                                                                                                                                                  | Undergraduate instruction                           |
| 60 | (Newton et al., 2013)         | Program principles, program components, program outcomes                                                                                                                                                                             | Teacher education programs                          |
| 61 | (O'Keefe and Head, 2011)      | Need, investment/capability, science/performance, output, adoption, impact                                                                                                                                                           | Scientific research programs                        |
| 62 | (Ohkubo et al., 2015)         | Inputs, processes, outputs, initial outcomes, intermediate outcomes, long-term outcome                                                                                                                                               | Knowledge management for global health              |
| 63 | (Park, 2015)                  | Inputs, activities, outputs (short-term, mid-term) and impacts (socioeconomic, long-term)                                                                                                                                            | R&D programs                                        |
| 64 | (Ratcliffe, 2012)             | Inputs, activities, outputs, outcomes (short-term), outcomes (intermediate & long-term)                                                                                                                                              | Farm to School programs                             |
| 65 | (Renger and Hurley, 2006)     | Chain of antecedent conditions and objectives                                                                                                                                                                                        | Generic                                             |
| 66 | (Ribeiro et al., 2013)        | Inputs, outputs, outcomes/impact (short-term, medium-term, long-term)                                                                                                                                                                | Sustainability assessment of electricity production |
| 67 | (Richards et al., 2017)       | Drivers for change (preconditions), enabling factors (preconditions), process, intended outcomes, indicators of success, long-term impact, long-term indicators of success                                                           | Academic integrity                                  |
| 68 | (Saltmarshe et al., 2003)     | Goals, performance assessment, performance management                                                                                                                                                                                | Overseas development assistance                     |
| 69 | (Savaya and Waysman, 2017)    | Situation, inputs, activities, outputs, initial outcomes, intermediate outcomes, long-term outcomes                                                                                                                                  | Social program development and evaluation           |
| 70 | (Seidman, 2017)               | Inputs, outputs/outcomes, impact                                                                                                                                                                                                     | Sustainable development                             |
| 71 | (Serowoky and George, 2015)   | Resources/inputs, activities, outputs, outcomes, impact                                                                                                                                                                              | Sexual health program                               |
| 72 | (Shao et al., 2012)           | Performance drivers, strategic supply performance outcomes, corporate performance outcomes                                                                                                                                           | Supply chain performance                            |
| 73 | (Silva et al., 2014)          | Resources, identification, treatment, long-term outcomes, impact                                                                                                                                                                     | Complex medical interventions                       |
| 74 | (Sitaker et al., 2008)        | Inputs, activities, goals, outcomes (short-term, medium-term, long-term)                                                                                                                                                             | Heart disease and stroke prevention                 |
| 75 | (Stewart et al., 2004)        | Implementation objectives, outputs, short-term outcome objectives, long-term outcome objectives                                                                                                                                      | Children's rehabilitation                           |

|    |                            |                                                                                                                                       |                                    |
|----|----------------------------|---------------------------------------------------------------------------------------------------------------------------------------|------------------------------------|
| 76 | (Strycker, 2016)           | Context, activities, inputs, outputs, outcomes, impacts                                                                               | Online education                   |
| 77 | (Thomson and Thomas, 2015) | Improvement, outcomes and impact                                                                                                      | Housing investment and health      |
| 78 | (Torghele et al., 2007)    | Inputs, activities, outputs, outcomes                                                                                                 | Emergency preparedness             |
| 79 | (Tremblay et al., 2017)    | Resources, activities, outputs, outcomes (short-term, intermediate and long-term)                                                     | Mental health                      |
| 80 | (Unrau, 2001)              | Activities, intermediate outcomes, end outcomes (short-term and long-term)                                                            | Family literacy program            |
| 81 | (Usher and Strange, 2011)  | Situation, priorities, inputs/resources, outputs (activities and participation), outcomes/impact (short-term, medium-term, long-term) | Public art                         |
| 82 | (Vallejo et al., 2017)     | Problem need, activities, results, effects, impacts and benefits                                                                      | Manufacturing management           |
| 83 | (Walker, 2015)             | Intervention/program elements, provider factors, process outcomes, knowledge & skills                                                 | Mental health                      |
| 84 | (Watkins et al., 2011)     | Leadership program activities, processes, emerging program outcomes                                                                   | Executive leadership               |
| 85 | (West, 2014)               | Action-oriented inputs, activities, reach, short-term outcome, intermediate outcome, long-term outcome                                | Diabetes management and prevention |
| 86 | (Williams, 2017)           | Input, process, output, individual outcome, immediate outcome, intermediate outcome, long-term outcome, (societal) impact             | Generic                            |
| 87 | (Yampolskaya et al., 2004) | Target population and conditions, categories of service, activities, strategies, short-term outcomes, long-term outcomes              | Mental health public policy        |

## References

- Adamson, K.A., Prion, S., 2016. Making Sense of Methods and Measurement : Logic Models. Clin. Simul. Nurs. 12, 1. doi:10.1016/j.ecns.2015.10.008
- Addor, M.L.O.U., Cobb, T.D., Dukes, E.F., Ellerbrock, M., Smutko, L.S., 2005. Linking Theory to Practice: A Theory of Change Model of the Natural Resources Leadership Institute. Confl. Resolut. Q. 23, 203–223. doi:10.1002/crq
- Afifi, R.A., Makhoul, J., Hajj, T. El, Nakkash, R.T., 2011. Developing a logic model for youth mental health : participatory research with a refugee community in Beirut. Health Policy Plan. 26, 508–517. doi:10.1093/heapol/czr001
- Allen, W., Cruz, J., Warburton, B., Allen, W., 2017. How Decision Support Systems Can Benefit from a Theory of Change Approach. Environ. Manage. 956–965. doi:10.1007/s00267-017-0839-y
- Aragón, A.O., Carlos, J., Macedo, G., 2010. A “Systemic Theories of Change” Approach for Purposeful Capacity Development. IDS Bull. 41, 87–99.
- Armstrong, E.G., Barsion, S., 2006. Using an Outcomes-Logic-Model Approach to Evaluate a Faculty Development Program of Medical Educators Using an Outcomes-Logic-Model Approach to. Acad. Med. 81, 483–488. doi:10.1097/01.ACM.0000222259.62890.71
- Baxter, S., Killoran, A., Kelly, M.P., Goyder, E., 2010. Synthesizing diverse evidence: The use of primary qualitative data analysis methods and logic models in public health reviews. Public Health 124, 99–106. doi:10.1016/j.puhe.2010.01.002
- Baxter, S.K., Blank, L., Woods, H.B., Payne, N., Rimmer, M., Goyder, E., 2014. Using logic model methods in systematic review synthesis : describing complex pathways in referral management interventions. BMC Med. Res. Methodol. 14, 62–70.

- Biggs, D., Cooney, R., Roe, D., Dublin, H.T., Allan, J.R., Challender, D.W.S., Skinner, D., 2016. Developing a theory of change for a community-based response to illegal wildlife trade. *Conserv. Biol.* 31, 5–12. doi:10.1111/cobi.12796
- Breuer, E., Silva, M.J. De, Fekadu, A., Luitel, N.P., Murhar, V., Nakku, J., Petersen, I., Lund, C., 2014. Using workshops to develop theories of change in five low and middle income countries: lessons from the programme for improving mental health care (PRIME). *Int. J. Ment. Health Syst.* 8, 1–13.
- Brown, C.A., 2012. Use of Logic Models to Plan and Assess Graduate Internship Experiences. *Tech Trends* 56, 37–43.
- Bucher, J.A., 2010. Using the Logic Model for Planning and Evaluation : Examples for New Users. *Home Health Care Manag. Pract.* 22, 325–333. doi:10.1177/1084822309353154
- Campbell, J.R., Palazzi, D.L., Rama, J., Balmer, D., Schutze, G.E., Turner, T.L., 2015. Building Bridges Between Silos : An Outcomes-Logic Model for a Multidisciplinary , Subspecialty Fellowship Education Program. *Acad. Pediatr.* 15, 584–587. doi:10.1016/j.acap.2015.08.010
- Carman, J.G., 2010. The accountability movement: what’s wrong with this theory of change? *Nonprofit Volunt. Sect. Q.* 39, 256–274.
- Cato, B., 2001. Enhancing Prevention Programs ’ Credibility Through the Use of a Logic Model. *J. Alcohol Drug Educ.* 50, 8–20.
- Chaskin, R.J., 2009. Children and Youth Services Review Toward a theory of change in community-based practice with youth : A case-study exploration. *Child. Youth Serv. Rev.* 31, 1127–1134. doi:10.1016/j.chilyouth.2009.07.012
- Clarke, B., Doabler, C.T., Cary, M.S., Kosty, D., Baker, S., Fien, H., Smolkowski, K., 2014. Preliminary Evaluation of a Tier 2 Mathematics Intervention for First-Grade Students : Using a Theory of Change to Guide Formative Evaluation Activities. *School Psych. Rev.* 43, 160–177.
- Cooksy, L.J., Gill, P., Kelly, P.A., 2001. The program logic model as an integrative framework for a multimethod evaluation. *Eval. Program Plann.* 24, 119–128. doi:10.1016/S0149-7189(01)00003-9
- Copper, I.D., 2011. Is the informationist a new role ? A logic model analysis. *J. Med. Libr. Assoc.* 99, 189–192. doi:10.3163/1536-5050.99.3.004
- Csiernik, R., Chaulk, P., Mcquaid, S., Mckee, K., 2015. Applying the Logic Model Process to Employee Assistance Programming Employee Assistance Programming. *J. Workplace Behav. Health* 30, 306–323. doi:10.1080/15555240.2014.999078
- Cullen, P., Clapham, K., Byrne, J., Hunter, K., Senserrick, T., Keay, L., Ivers, R., 2016. The importance of context in logic model construction for a multi-site community-based Aboriginal driver licensing program. *Eval. Program Plann.* 57, 8–15. doi:10.1016/j.evalprogplan.2016.03.011
- Das, B.M., Petruzzello, S.J., Ryan, K.E., 2014. Development of a Logic Model for a Physical Activity – Based Employee Wellness Program for Mass Transit Workers. *Prev. Chronic Dis. Public Heal. Res. Pract. Policy* 11, 1–7.
- De-Regil, L.M., Peña-Rosas, J.P., Flores-Ayala, R., Jefferds, M., 2017. Development and use of the generic WHO / CDC logic model for vitamin and mineral interventions in public health programmes. *Public Health Nutr.* 17, 634–639. doi:10.1017/S1368980013000554
- Dorsey, S.G., Schiffman, R., Redeker, N.S., Heitkemper, M., McCloskey, D.J., Weglicki, L.S., Grady, P.A., 2014. National Institute of Nursing Research Centers of Excellence : A logic model for sustainability , leveraging resources , and collaboration to accelerate cross-disciplinary science. *Nurs. Outlook* 62, 384–393. doi:10.1016/j.outlook.2014.06.003
- Dubeau, D., Gervais, C., Montigny, F. De, Lacharite, C., 2015. The Father Friendly Initiative within Families : Using a logic model to develop program theory for a father support program. *Eval. Program Plann.* 52, 133–141. doi:10.1016/j.evalprogplan.2015.04.006
- Dykeman, M., MacIntosh, J., Seaman, P., Davidson, P., 2003. Development of a Program Logic Model to Measure the Processes and Outcomes of a Nurse-Managed Community Health Clinic. *J. Prof. Nurs.* 19, 197–203. doi:10.1016/S8755-7223(03)00070-X



- Dyson, A., Todd, L., 2017. Dealing with complexity : theory of change evaluation and the full service extended schools initiative. *Int. J. Res. Method Educ.* 33, 119–134. doi:10.1080/1743727X.2010.484606
- Fielden, S.J., Rusch, M.L., Masinda, M.T., Sands, J., Frankish, J., Å, B.E., 2007. Key considerations for logic model development in research partnerships : A Canadian case study. *Eval. Program Plann.* 30, 115–124. doi:10.1016/j.evalprogplan.2007.01.002
- Francesconi, G.N., Ruben, R., 2017. FairTrade ' s theory of change : an evaluation based on the cooperative life cycle framework and mixed methods. *J. Dev. Eff.* 6, 268–283. doi:10.1080/19439342.2014.918164
- Freedman, A.M., Simmons, S., Lloyd, L.M., Redd, T.R., Alperin, M.M., Salek, S.S., Swier, L., Miner, K.R., 2014. Public Health Training Center Evaluation: A Framework for Using Logic Models to Improve Practice and Educate the Public Health Workforce Ariela. *Health Promot. Pract.* 15, 80–88. doi:10.1177/1524839913509271
- Goeschel, C.A., Weiss, W.M., Pronovost, P.J., 2017. Using a logic model to design and evaluate quality and patient safety improvement programs. *Int. J. Qual. Heal. Care* 24, 330–337.
- Goldman, K.D., Schmalz, K.J., 2006. Logic Models: The Picture Worth Ten Thousand Words. *Health Promot. Pract.* 7, 8–12. doi:10.1177/1524839905283230
- Hailemariam, M., Fekadu, A., Selamu, M., Alem, A., Medhin, G., Giorgis, T.W., Desilva, M., Breuer, E., 2015. Developing a mental health care plan in a low resource setting : the theory of change approach. *BMC Health Serv. Res.* 1–11. doi:10.1186/s12913-015-1097-4
- Hayes, H., Parchman, M.L., Howard, R., 2011. A Logic Model Framework for Evaluation and Planning in a Primary Care Practice-based Research Network (PBRN). *J. Am. Board Fam. Med.* 24, 576–582. doi:10.3122/jabfm.2011.05.110043
- Helitzer, D., Hollis, C., Urquieta, B., Hernandez, D., Sanders, M., Roybal, S., Deusen, I. Van, 2010. Evaluation for community-based programs : The integration of logic models and factor analysis. *Eval. Program Plann.* 33, 223–233. doi:10.1016/j.evalprogplan.2009.08.005
- Helitzer, D., Willging, C., Hathorn, G., Benally, J., 2009. Using Logic Models in a Community-Based Agricultural Injury Prevention Project. *Public Health Rep.* 124, 63–73.
- Hense, J., Kriz, W.C., Wolfe, J., 2009. Putting theory-oriented evaluation into practice: a logic model approach for evaluating SIMGAME. *Simul. Gaming* 40, 110–133.
- Hernandez, M., Hodges, S., 2006. Applying a Theory of Change Approach to Interagency Planning in Child Mental Health. *Am. J. Community Psychol.* 38, 165–173. doi:10.1007/s10464-006-9079-7
- Herranz, J., 2017. The Logic Model as a Tool for Developing a Network Performance Measurement System. *Public Perform. Mangement Rev.* 34, 56–80. doi:10.2753/PMR1530-9576340104
- Holliday, L.R., 2014. Studies in Educational Evaluation Using logic model mapping to evaluate program fidelity. *Stud. Educ. Eval.* 42, 109–117. doi:10.1016/j.stueduc.2014.04.001
- Hornik, K., Cutts, B., Greenlee, A., 2016. Community Theories of Change : Linking Environmental Justice to Sustainability through Stakeholder Perceptions in Milwaukee (WI, USA). *Int. J. Environ. Res. Public Health* 13, 1–17. doi:10.3390/ijerph13100979
- Huhman, M., Heitzler, C., Wong, F., 2004. The VERB Campaign Logic Model : A Tool for Planning and Evaluation. *Prev. Chronic Dis. Public Heal. Res. Pract. Policy* 1, 1–6.
- Hutchings, C., 2017. Balancing accountability and learning : a review of Oxfam GB ' s global performance framework performance framework. *J. Dev. Eff.* 6, 425–435. doi:10.1080/19439342.2014.971552
- Hyvärinen, J., 2017. TEKES impact goals, logic model and evaluation of socio-economic effects. *Res. Eval.* 20, 313–323. doi:10.3152/095820211X13164389670220
- Isaacs, B., Clark, C., Correia, S., Flannery, J., 2009. Utility of Logic Models to Plan Quality of Life Outcome Evaluations. *J. Policy Pract. Intellect. Disabil.* 6, 52–61.
- Jaegers, L., Dale, A.M., Weaver, N., Buchholz, B., Welch, L., Evanoff, B., 2014. Development of a Program Logic Model and Evaluation Plan for a Participatory Ergonomics Intervention in Construction. *Am. J. Ind. Med.* 361, 351–361. doi:10.1002/ajim.22249.

- Jordan, G.B., 2017. A theory-based logic model for innovation policy and evaluation. *Res. Eval.* 19, 263–273. doi:10.3152/095820210X12827366906445
- Julian, D.A., 1997. The utilization of the logic model as a system level planning and evaluation device. *Eval. Program Plann.* 20, 251–257.
- Julian, D.A., Jones, A., Deyo, D., 1995. Open system evaluation and the logic model: program planning and evaluation tools. *Eval. Program Plann.* 18, 333–341.
- Klugman, B., 2011. Effective social justice advocacy: a theory-of-change framework for assessing progress. *Reprod. Health Matters* 19, 146–162. doi:10.1016/S0968-8080(11)38582-5
- Lee, M., Kang, H., 2014. Multicultural Mentoring Program Using Logic Model as an Integrative Framework. *Adv. Sci. Technol. Lett.* 71, 154–158.
- Loiseau, B., Benedict, D., Sibbald, R., Raman, S.A., 2016. How can a Theory of Change framework be applied to short-term international volunteering ? *Int. Health* 310–312. doi:10.1093/inthealth/ihw036
- Mackenzie, M., Blamey, A., 2005. The Practice and the Theory: Lessons from the Application of a Theoris of Change Approach. *Evaluation* 11, 151–168. doi:10.1177/1356389005055538
- MacPhee, M., 2009. Developing a practice-academic partnership logic model. *Nurs. Outlook* 57, 143–147. doi:10.1016/j.outlook.2008.08.003
- Mayne, J., 2016. Useful Theory of Change Models. *Can. J. Progr. Eval.* Fall, 119–142. doi:10.3138/cjpe.230
- McLaughlin, J.A., Jordan, G.B., 1999. Logic models ] a tool for telling your program | s performance story. *Eval. Program Plann.* 22, 54–61.
- Medeiros, L.C., Butkus, S.N., Chipman, H., Cox, R.H., Jones, L., Little, D., 2005. A Logic Model Framework for Community Nutrition Education. *J. Nutr. Educ. Behav.* 37, 197–202.
- Millar, A., Simeone, R.S., Carnevale, J.T., 2001. Logic models: a systems tool for performance management. *Eval. Program Plann.* 24, 73–81.
- Monroe, L., Horm, D.M., Monroe, L., Horm, D.M., 2012. Using a Logic Model to Evaluate Undergraduate Instruction in a Laboratory Preschool Using a Logic Model to Evaluate Undergraduate Instruction in a Laboratory Preschool. *Early Educ. Dev.* 23, 227–241. doi:10.1080/10409289.2012.619135
- Newton, X.A., Poon, R.C., Nunes, N.L., Stone, E.M., 2013. Research on teacher education programs : Logic model approach. *Eval. Program Plann.* 36, 88–96. doi:10.1016/j.evalprogplan.2012.08.001
- O’Keefe, C.M., Head, R.J., 2011. Application of logic models in a large scientific research program. *Eval. Program Plann.* 34, 174–184. doi:10.1016/j.evalprogplan.2011.02.008
- Ohkubo, S., Harlan, S. V, Ahmed, N., Salem, R.M., 2015. Conceptualizing a New Knowledge Management Logic Model for Global Health : A Case-Study Approach. *J. Inf. Knowl. Manag.* 14. doi:10.1142/S021964921550015X
- Park, S., 2015. The R & D logic model : Does it really work ? An empirical verification using successive binary logistic regression models. *Scientometrics* 105, 1399–1439. doi:10.1007/s11192-015-1764-6
- Ratcliffe, M.M., 2012. A Sample Theory-Based Logic Model To Improve Program Development, Implementation, and Sustainability of Farm to School Programs. *Child. Obes.* 8, 315–322. doi:10.1089/chi.2012.0048
- Renger, R., Hurley, C., 2006. From theory to practice : Lessons learned in the application of the ATM approach to developing logic models. *Eval. Program Plann.* 29, 106–119. doi:10.1016/j.evalprogplan.2006.01.004
- Ribeiro, F., Ferreira, P., Araújo, M., 2013. Sustainability assessment of electricity production using a logic models approach. *Renew. Sustain. Energy Rev.* 28, 215–223. doi:10.1016/j.rser.2013.07.034
- Richards, D., Saddiqui, S., White, F., McGuigan, N., 2017. Quality in Higher Education A theory of change for student-led academic integrity. *Qual. High. Educ.* 8322, 1–18. doi:10.1080/13538322.2016.1265849
- Saltmarshe, D., Ireland, M., McGregor, J.A., 2003. THE PERFORMANCE FRAMEWORK : A SYSTEMS APPROACH TO UNDERSTANDING PERFORMANCE MANAGEMENT. *Public Adm. Dev.* 23, 445–456.



- Savaya, R., Waysman, M., 2017. The Logic Model The Logic Model: A Tool for Incorporating Theory in Development and Evaluation of Programs. *Adm. Soc. Work* 29, 85–103. doi:10.1300/J147v29n02
- Seidman, G., 2017. Does SDG 3 have an adequate theory of change for improving health systems performance? *J. Glob. Health* 7, 1–7. doi:10.7189/jogh.07.010302
- Serowoky, M.L., George, F.N.P.N., 2015. Using the Program Logic Model to Evaluate ¡Cuidate!: A Sexual Health Program for Latino Adolescents in a School-Based Health Center. *Worldviews Evidence-Based Nurs.* 12, 297–305.
- Shao, J., Moser, R., Henke, M., 2012. Multidimensional supply performance framework: A conceptual development and empirical analysis. *Intern. J. Prod. Econ.* 138, 26–34. doi:10.1016/j.ijpe.2011.08.025
- Silva, D., Silva, M.J. De, Breuer, E., Lee, L., Asher, L., Chowdhary, N., Lund, C., Patel, V., 2014. Theory of Change: a theory-driven approach to enhance the Medical Research Council 's framework for complex interventions Theory of Change: a theory-driven approach to enhance the Medical Research Council 's framework for complex interventions. *Trials* 15, 267–278.
- Sitaker, M., Jernigan, J., Ladd, S., Patanian, M., 2008. Adapting Logic Models Over Time: The Washington State Heart Disease and Stroke Prevention Program Experience. *Prev. Chronic Dis. Public Heal. Res. Pract. Policy* 5.
- Stewart, D., Law, M., Russell, D., Hanna, S., 2004. Evaluating children's rehabilitation services: an application of a programme logic model. *Child Care, Heal. Dev.* 30, 453–462.
- Strycker, J., 2016. Logic Models as a Way to Support Online Students and Their Projects. *J. Educ. Online* 13, 135–150.
- Thomson, H., Thomas, S., 2015. Social Science & Medicine Developing empirically supported theories of change for housing investment and health. *Soc. Sci. Med.* 124, 205–214. doi:10.1016/j.socscimed.2014.11.043
- Torghele, K., Buyum, A., Dubruiel, N., Augustine, J., Houlihan, C., Alperin, M., Miner, K.R., 2007. Logic Model Use in Developing a Survey Instrument for Program Evaluation: Emergency Preparedness Summits for Schools of Nursing in Georgia. *Public Health Nurs.* 24, 472–479.
- Tremblay, C., Coulombe, V., Briand, C., 2017. Users ' involvement in mental health services: programme logic model of an innovative initiative in integrated care. *Int. J. Ment. Health Syst.* 1–10. doi:10.1186/s13033-016-0111-5
- Unrau, Y.A., 2001. Using client exit interviews to illuminate outcomes in program logic models: a case example. *Eval. Program Plann.* 24, 353–361.
- Usher, D., Strange, I., 2011. Evaluating public art in the North of England: Logic models, frameworks and emerging impact. *Local Econ.* 26, 203–213. doi:10.1177/0269094211401490
- Vallejo, C., Romero, D., Molina, A., 2017. Implementation of best manufacturing practices using logic models and system dynamics: project design and project assessment views. *Inf. Syst. E-bus. Manag.* 15, 535–575. doi:10.1007/s10257-016-0327-6
- Walker, J.S., 2015. A Theory of Change for Positive Developmental Approaches to Improving Outcomes Among Emerging Adults with Serious Mental Health Conditions. *J. Behav. Health Serv. Res.* 131–149. doi:10.1007/s11414-015-9455-x
- Watkins, K.E., Lysø, I.H., DeMarrais, K., 2011. Evaluating Executive Leadership Programs: A Theory of Change Approach. *Adv. Dev. Hum. Resour.* 13, 208–239. doi:10.1177/1523422311415643
- West, J.F., 2014. Public health program planning logic model for community engaged Type 2 diabetes management and prevention. *Eval. Program Plann.* 42, 43–49. doi:10.1016/j.evalproplan.2013.09.001
- Williams, D., 2017. The Evolution of the Performance Model from Black Box to the Logic Model Through Systems Thinking. *Int. J. Public Adm.* 37, 932–944. doi:10.1080/01900692.2014.944989
- Yampolskaya, S., Nesman, T., Hernandez, M., Koch, D., 2004. Using Concept Mapping to Develop a Logic Model and Articulate a Program Theory: A Case Example. *Am. J. Eval.* 25, 191–207.
